# Supplementary material
Source: MDPI journal article supplement (https://www.mdpi.com/2072-4292/6/11/11283)

*Supplementary Information*

## **Daily Area of Snow Melt Onset on Arctic Sea Ice from Passive Microwave Satellite Observations 1979–2012. *Remote Sensing*, 2014, 6, 11283–11314**

**Angela C. Bliss \* and Mark R. Anderson**

Earth and Atmospheric Sciences, University of Nebraska-Lincoln, 214 Bessey Hall Lincoln, NE 68588-0340, USA; E-Mail: mra@unl.edu

\* Author to whom correspondence should be addressed; E-Mail: acbliss3@huskers.unl.edu; Tel.: +1-402-472-2663; Fax: +1-402-472-4917.

*Received: 6 August 2014; in revised form: 6 October 2014 / Accepted: 24 October 2014 /*

*Published: 13 November 2014*

---

**Figure S1.** Arctic Ocean 3-day running mean of daily MO area for (a) SMMR years, (b) early SSM/I years, and (c) late SSM/I and SSMIS years.

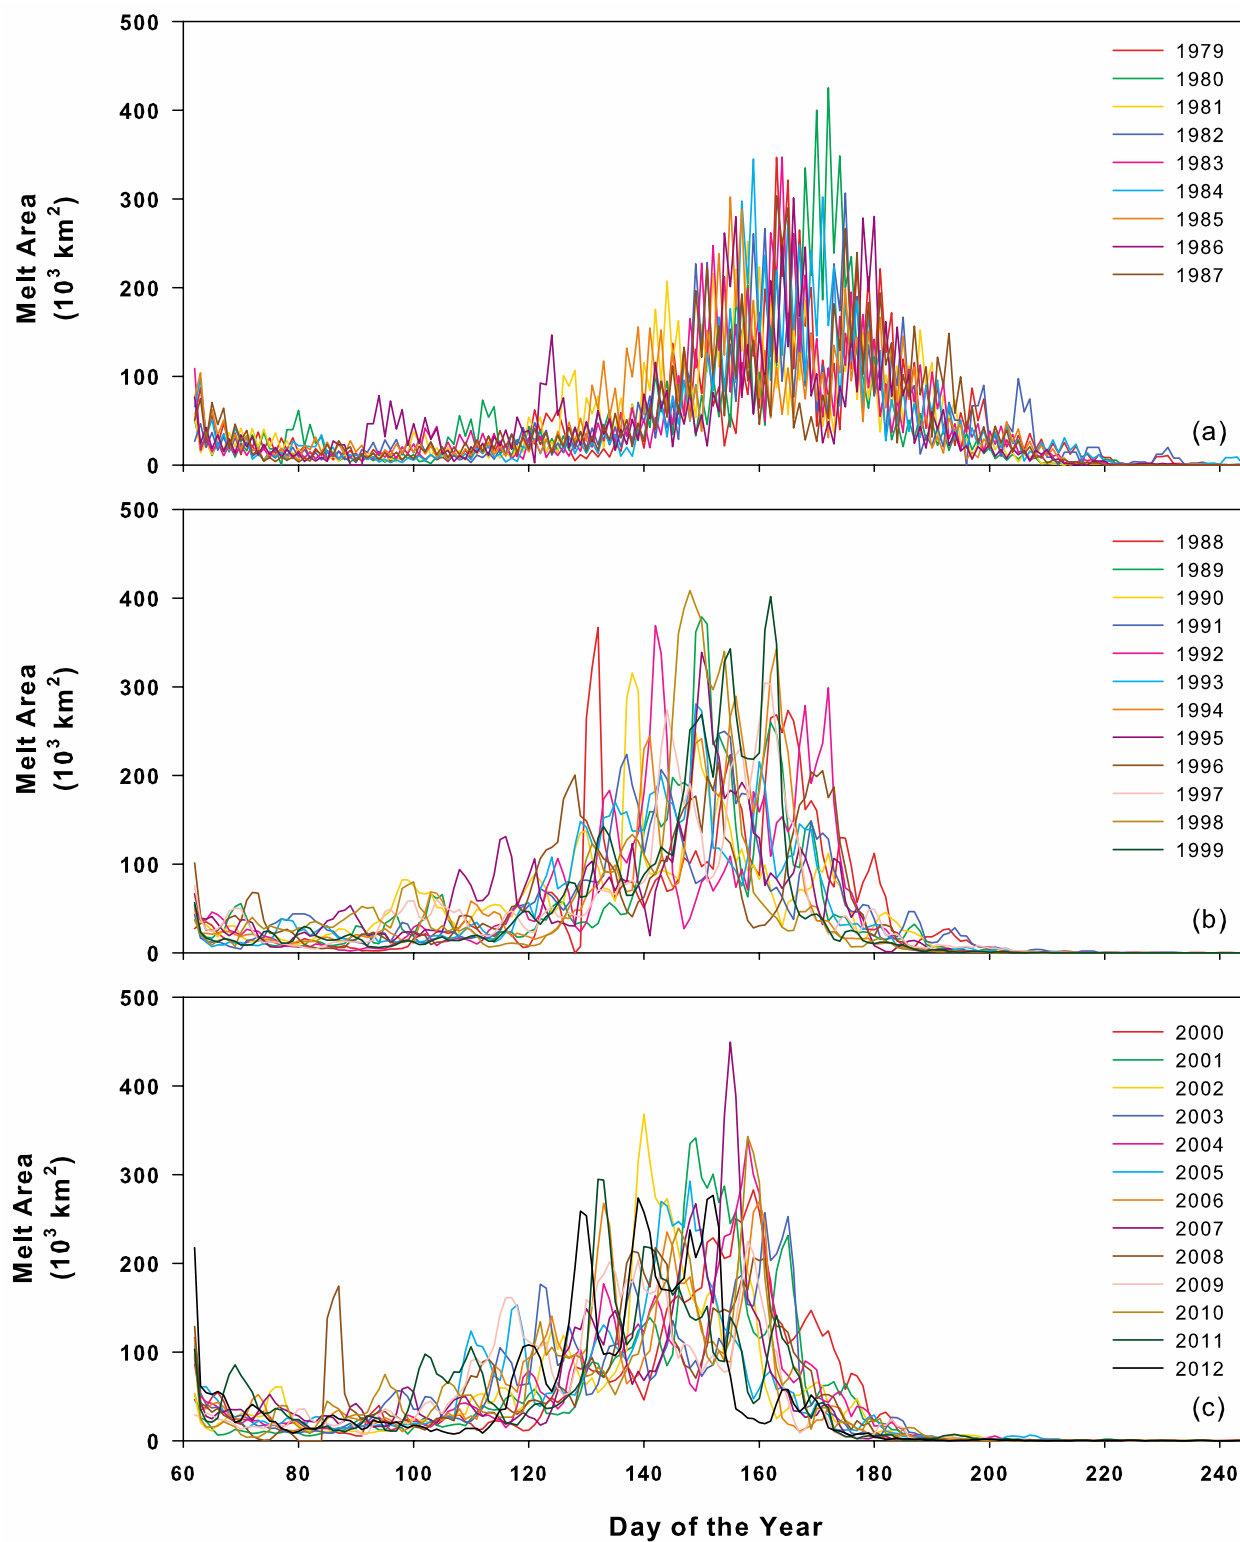

**Figure S2.** Barents Sea 3-day running mean of daily MO area for (a) SMMR years, (b) early SSM/I years, and (c) late SSM/I and SSMIS years.

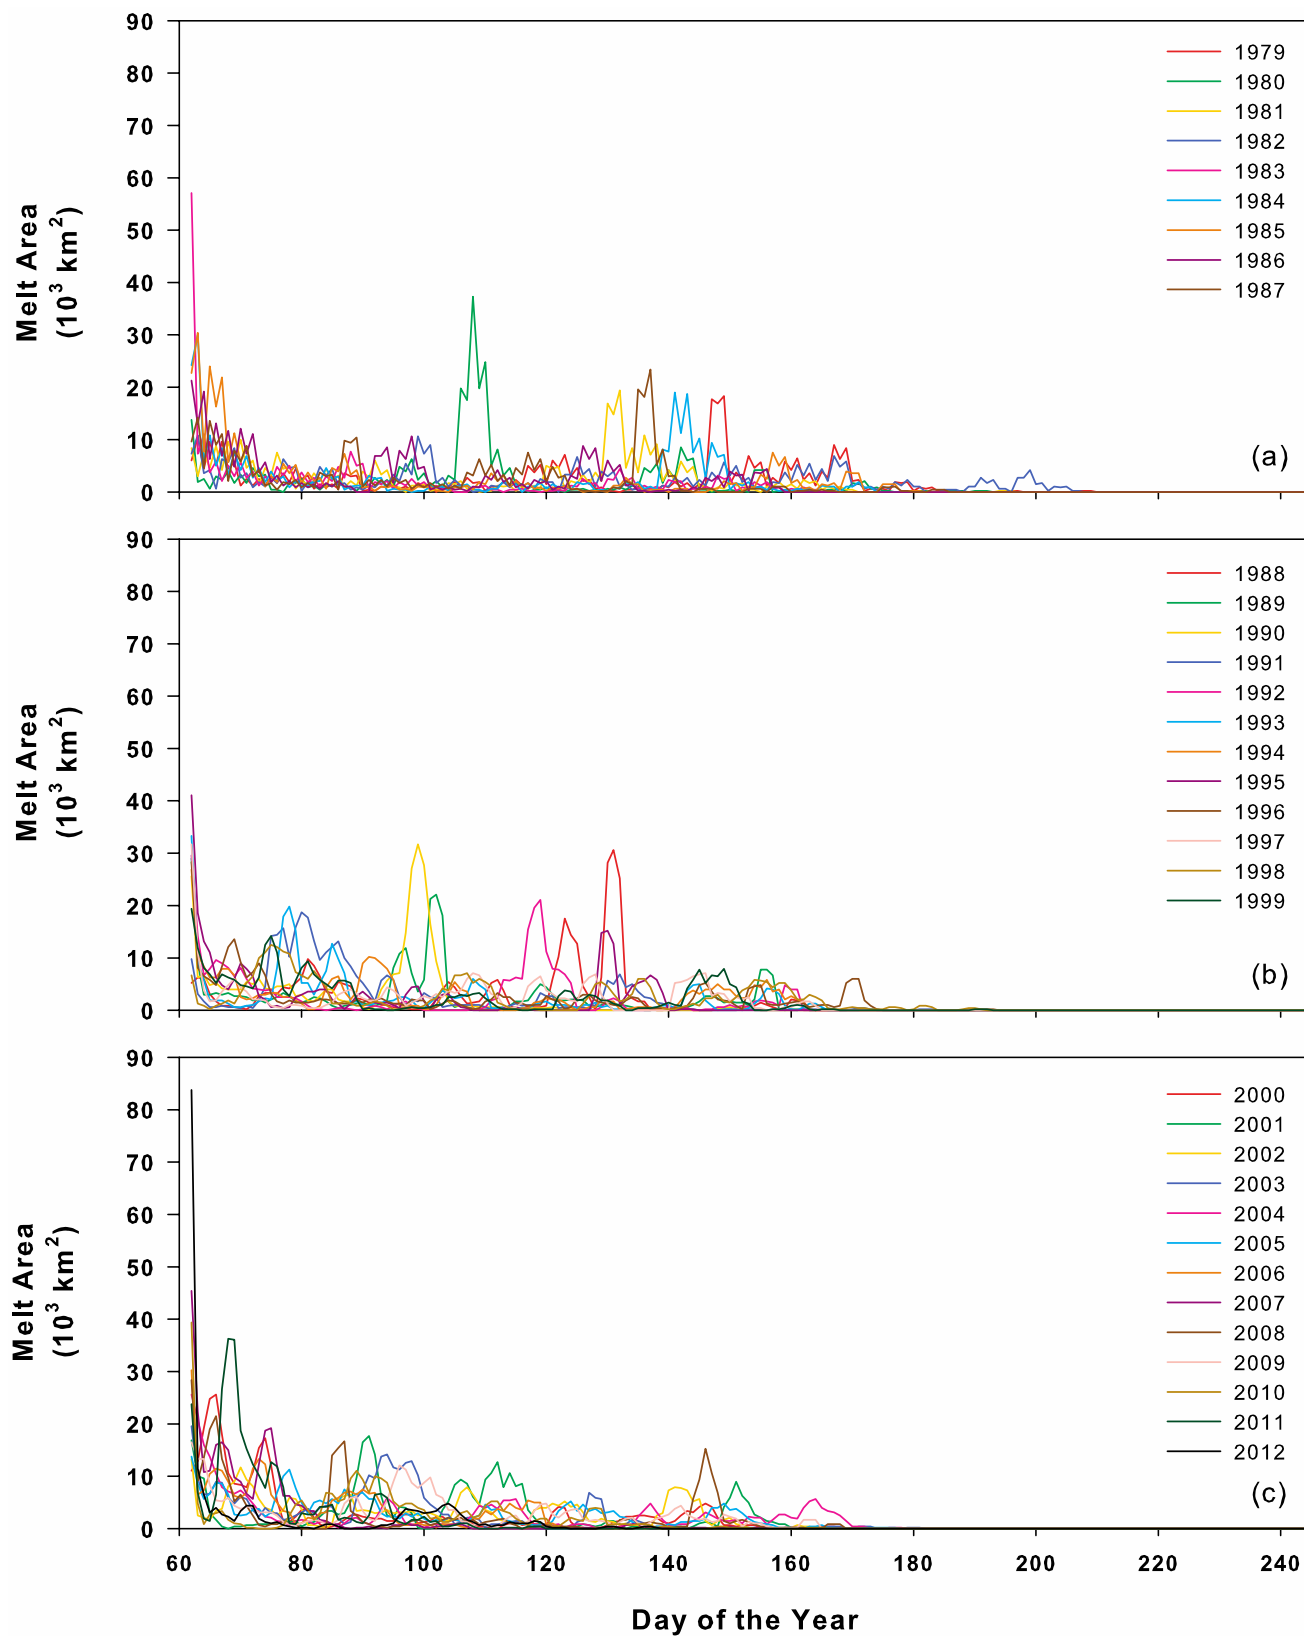

**Figure S3.** Laptev Sea 3-day running mean of daily MO area for (a) SMMR years, (b) early SSM/I years, and (c) late SSM/I and SSMIS years.

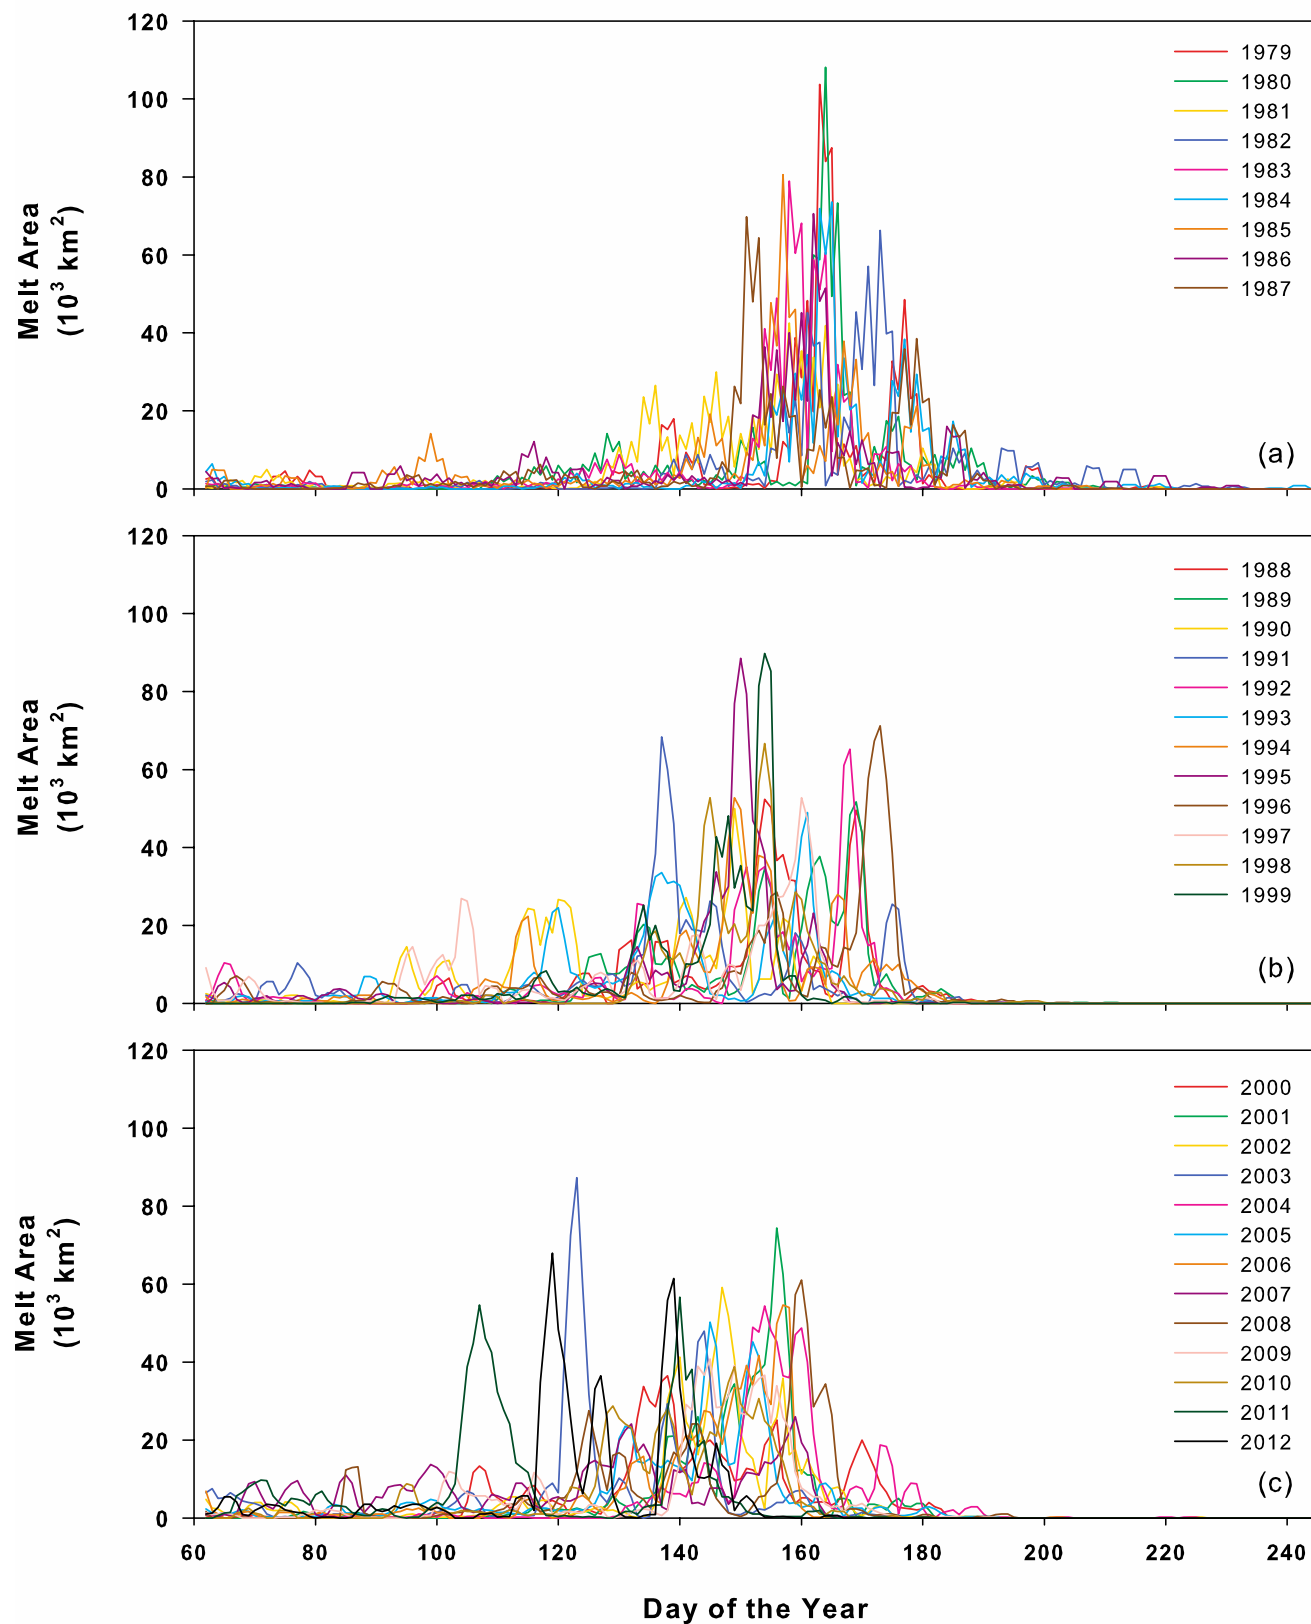

**Figure S4.** East Siberian Sea 3-day running mean of daily MO area for (a) SMMR years, (b) early SSM/I years, and (c) late SSM/I and SSMIS years.

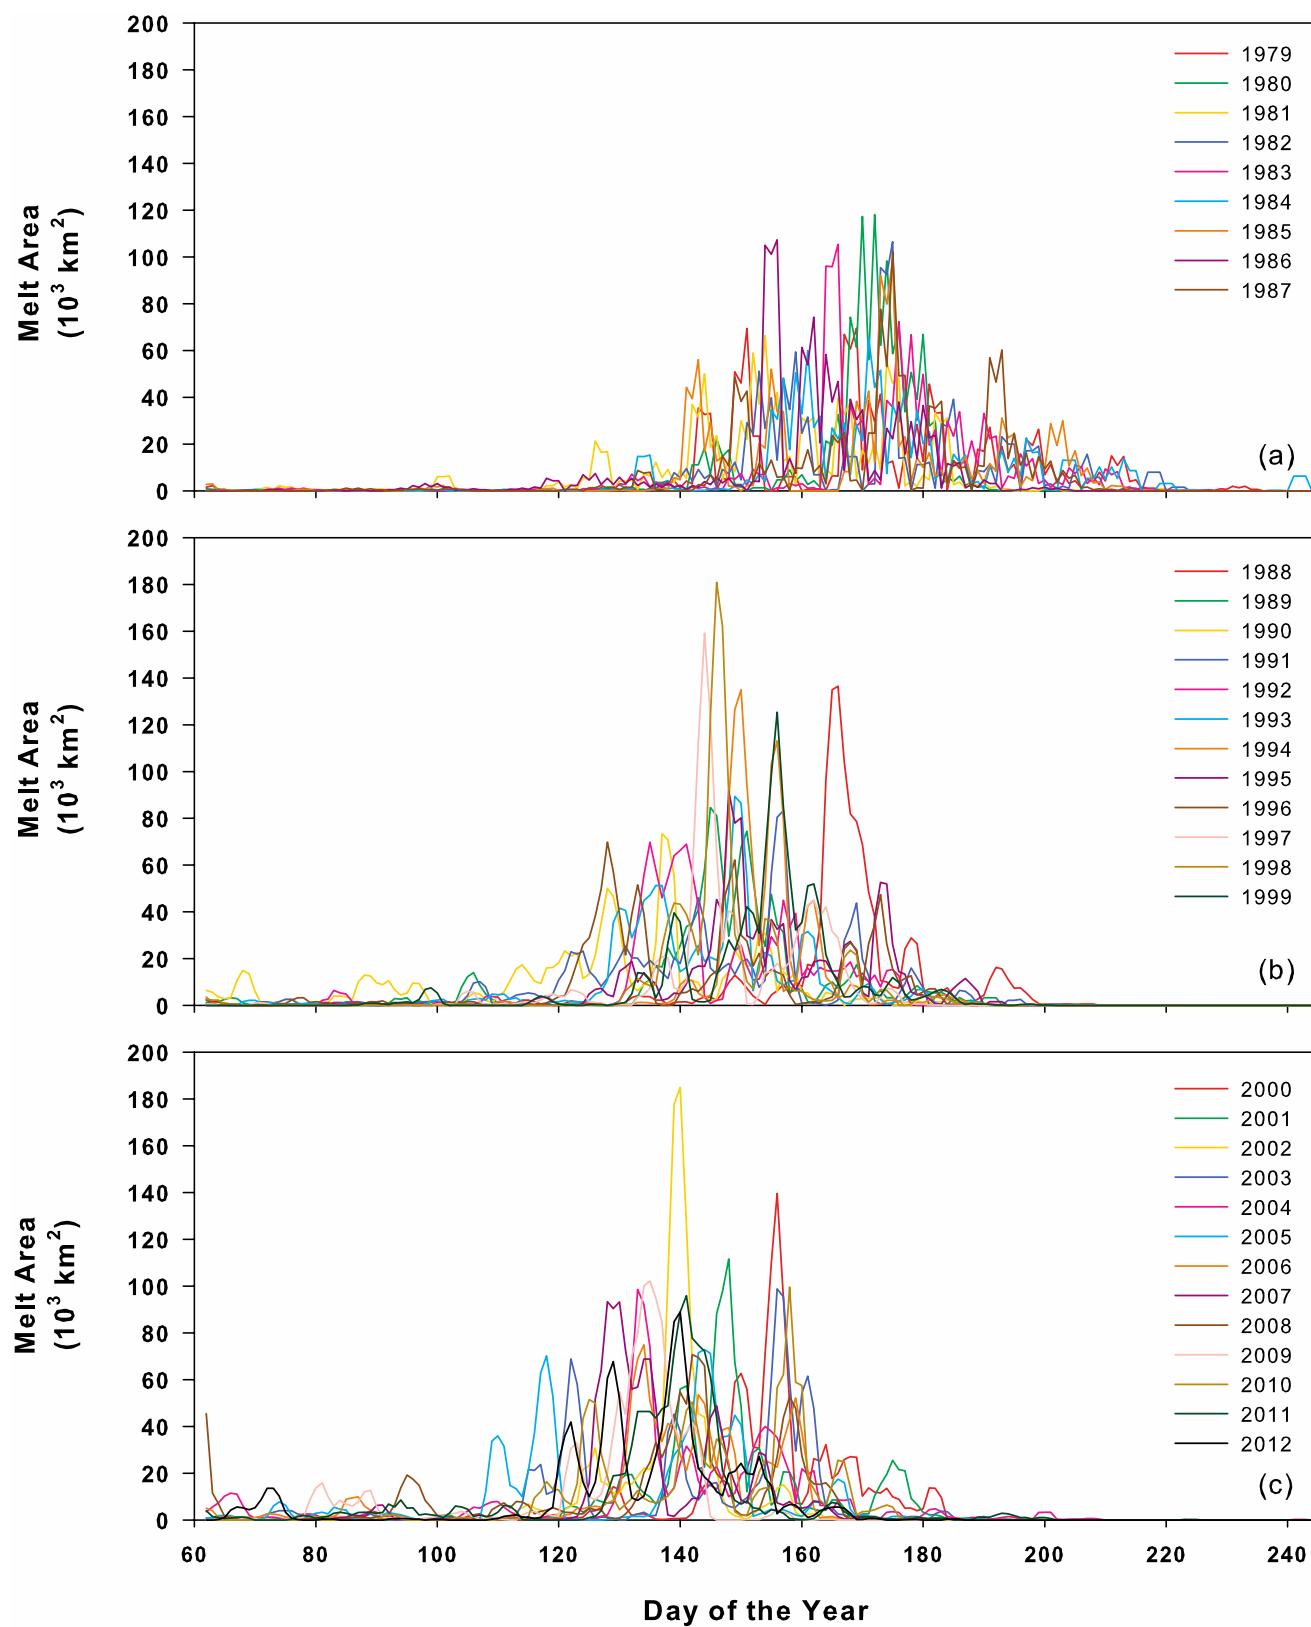

**Figure S5.** Chukchi Sea 3-day running mean of daily MO area for (a) SMMR years, (b) early SSM/I years, and (c) late SSM/I and SSMIS years.

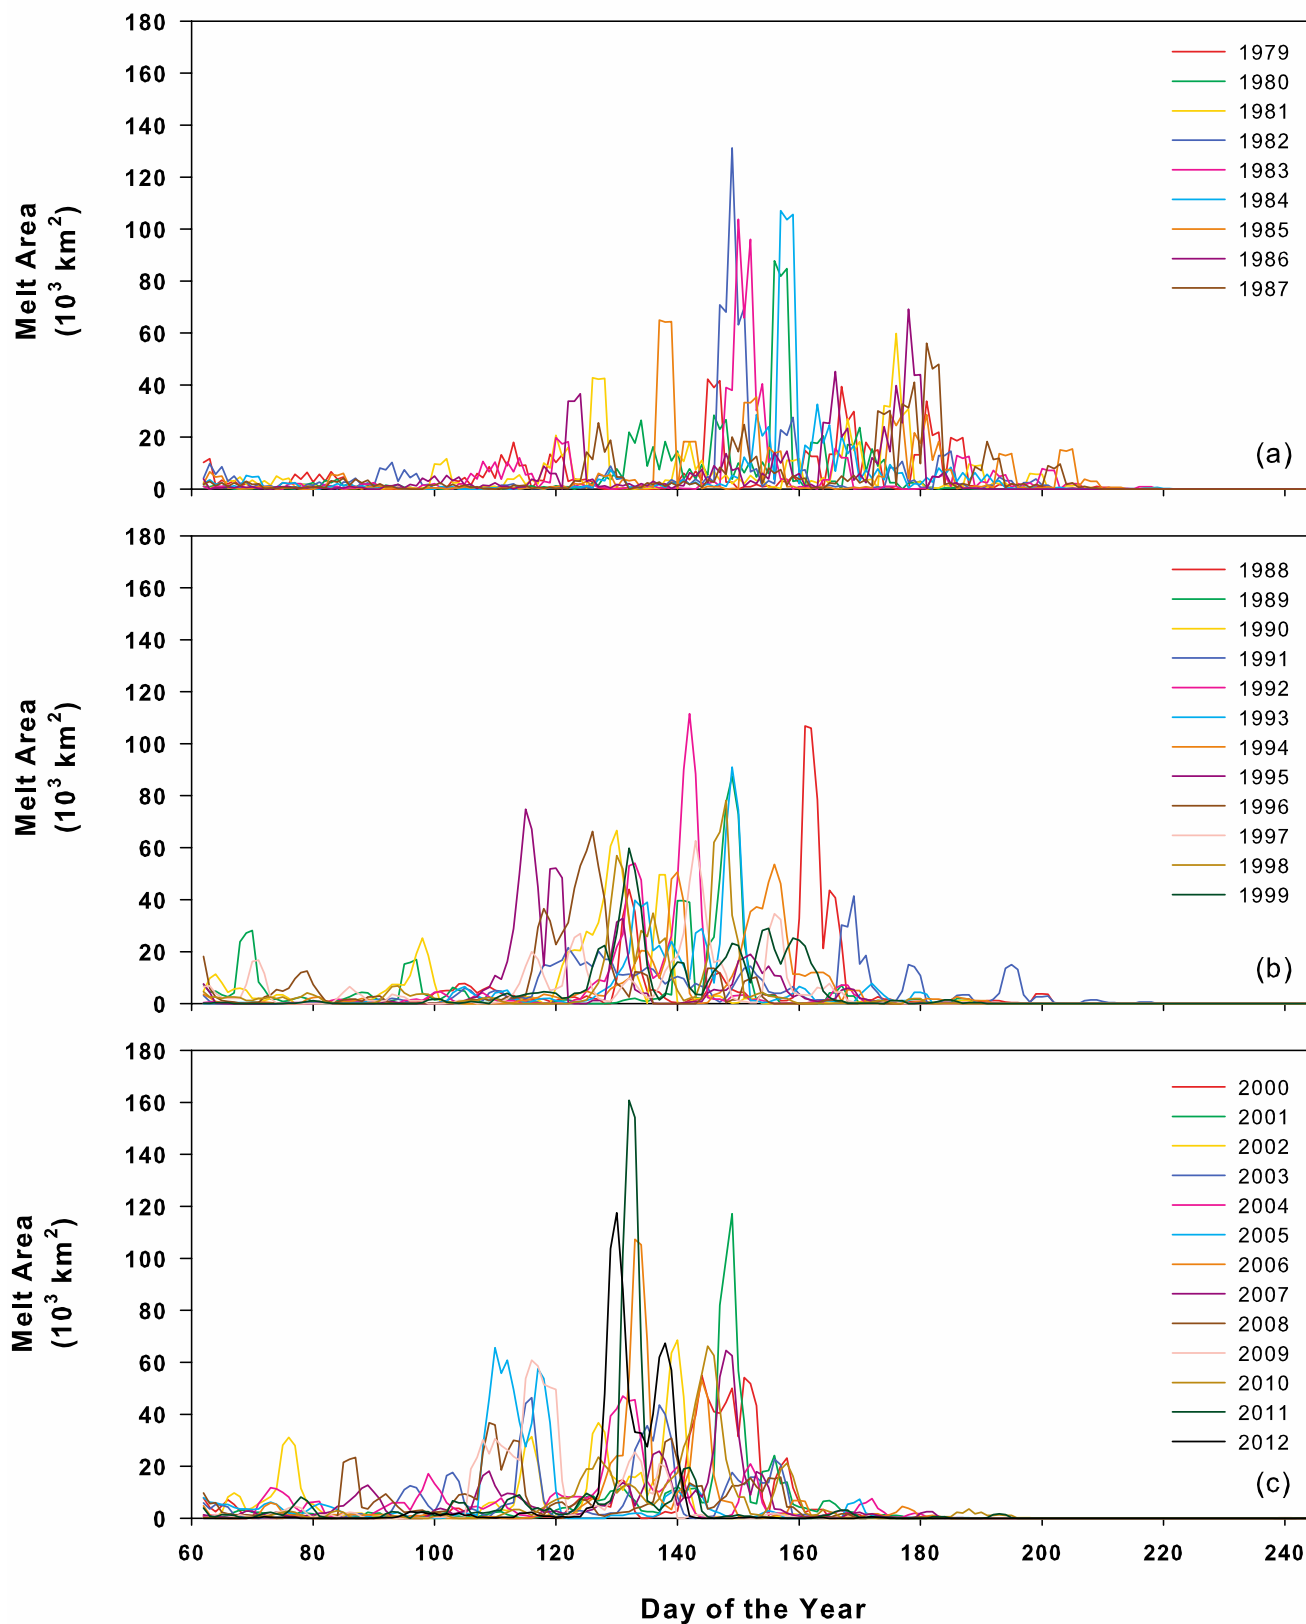

**Figure S6.** Beaufort Sea 3-day running mean of daily MO area for (a) SMMR years, (b) early SSM/I years, and (c) late SSM/I and SSMIS years.

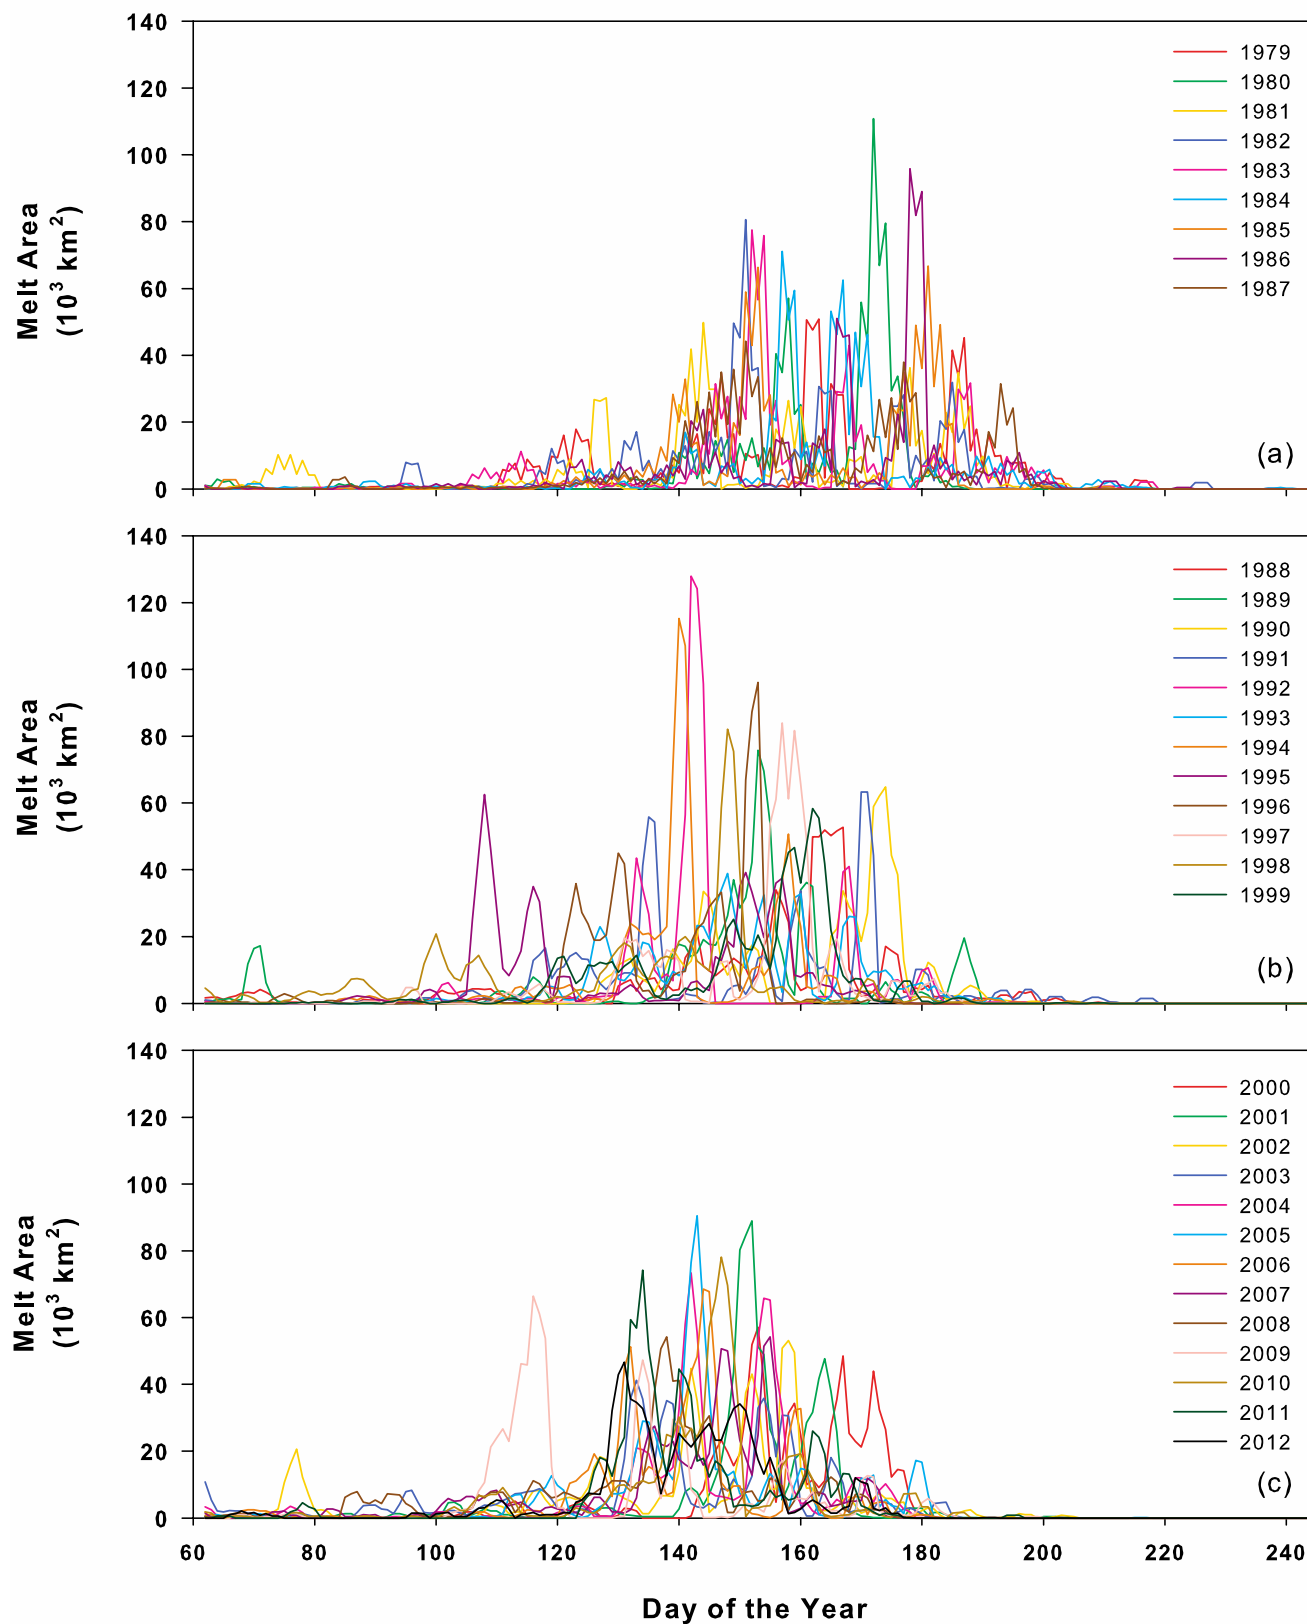

**Figure S7.** Canadian Arctic Archipelago 3-day running mean of daily MO area for (a) SMMR years, (b) early SSM/I years, and (c) late SSM/I and SSMIS years.

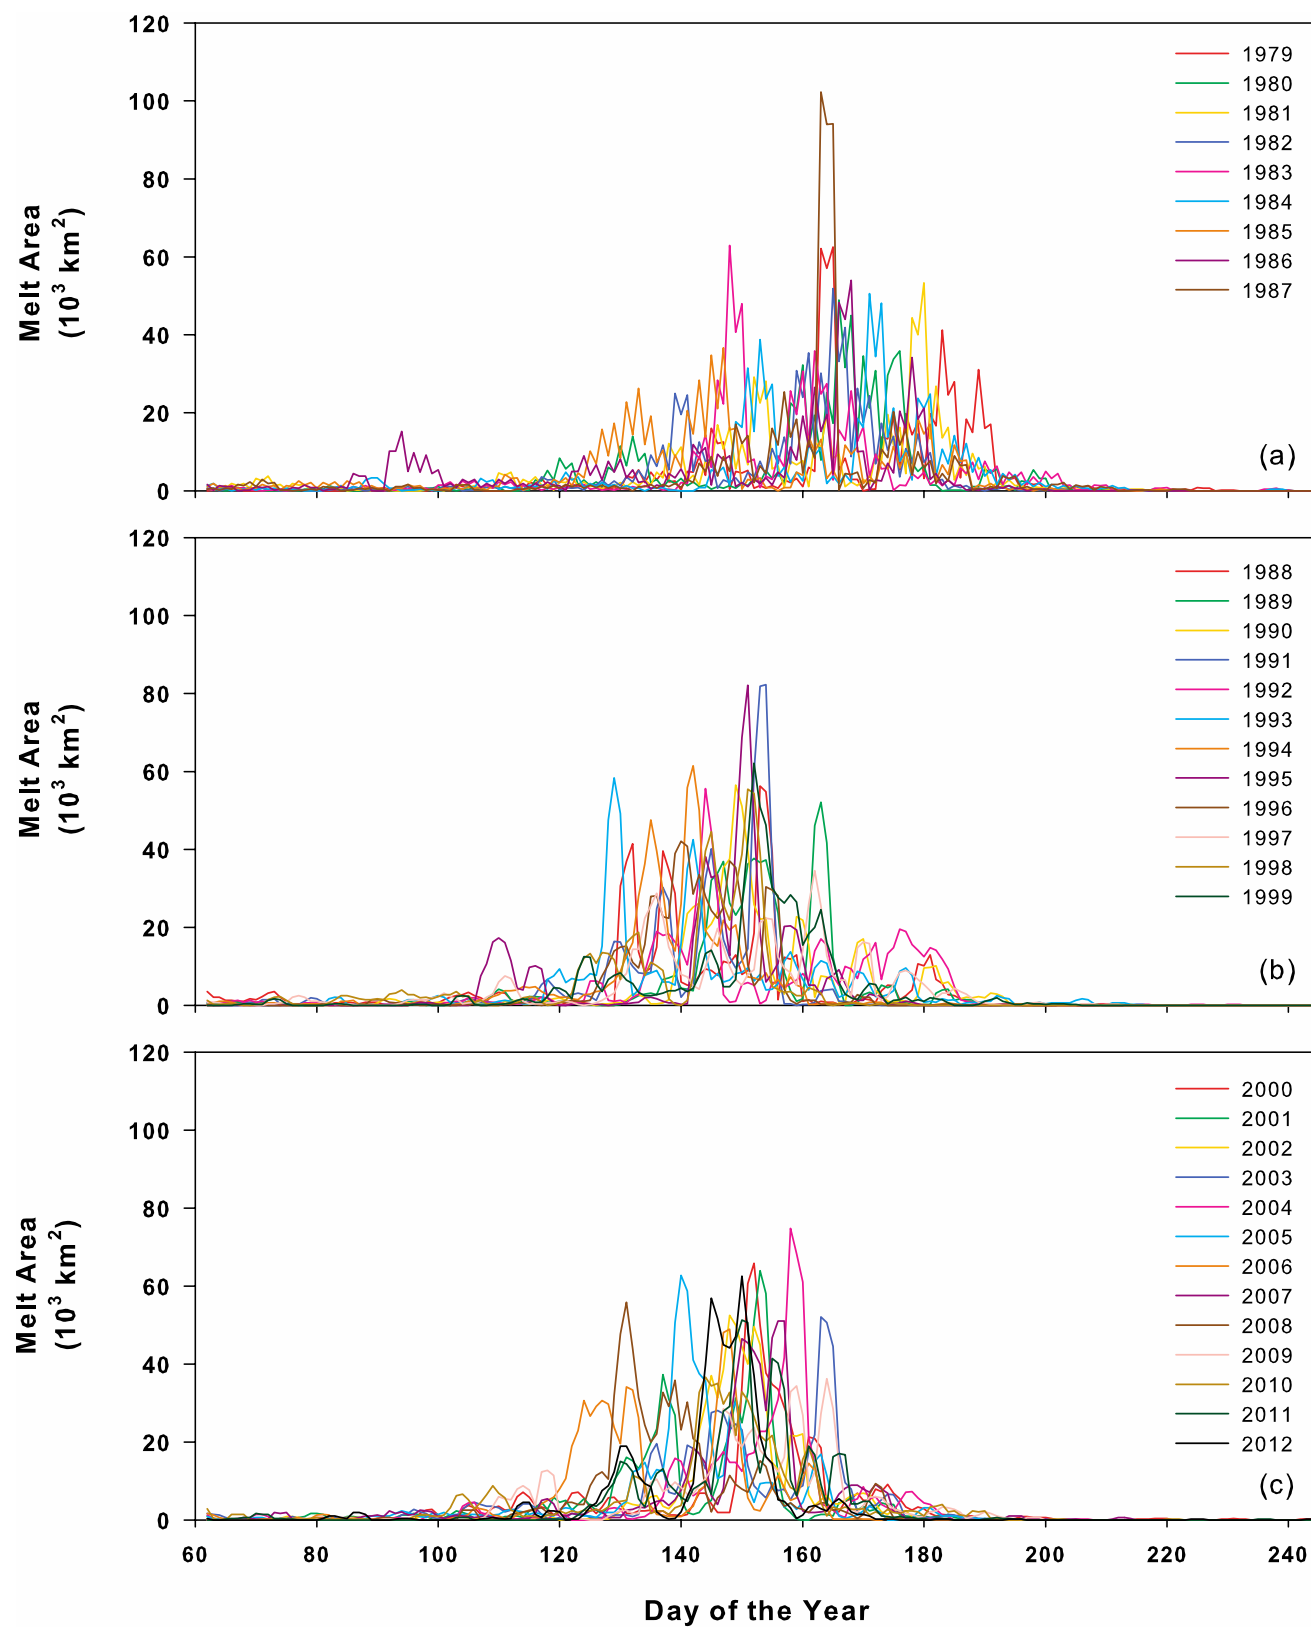



**Figure S8.** Central Arctic 3-day running mean of daily MO area for (a) SMMR years, (b) early SSM/I years, and (c) late SSM/I and SSMIS years.

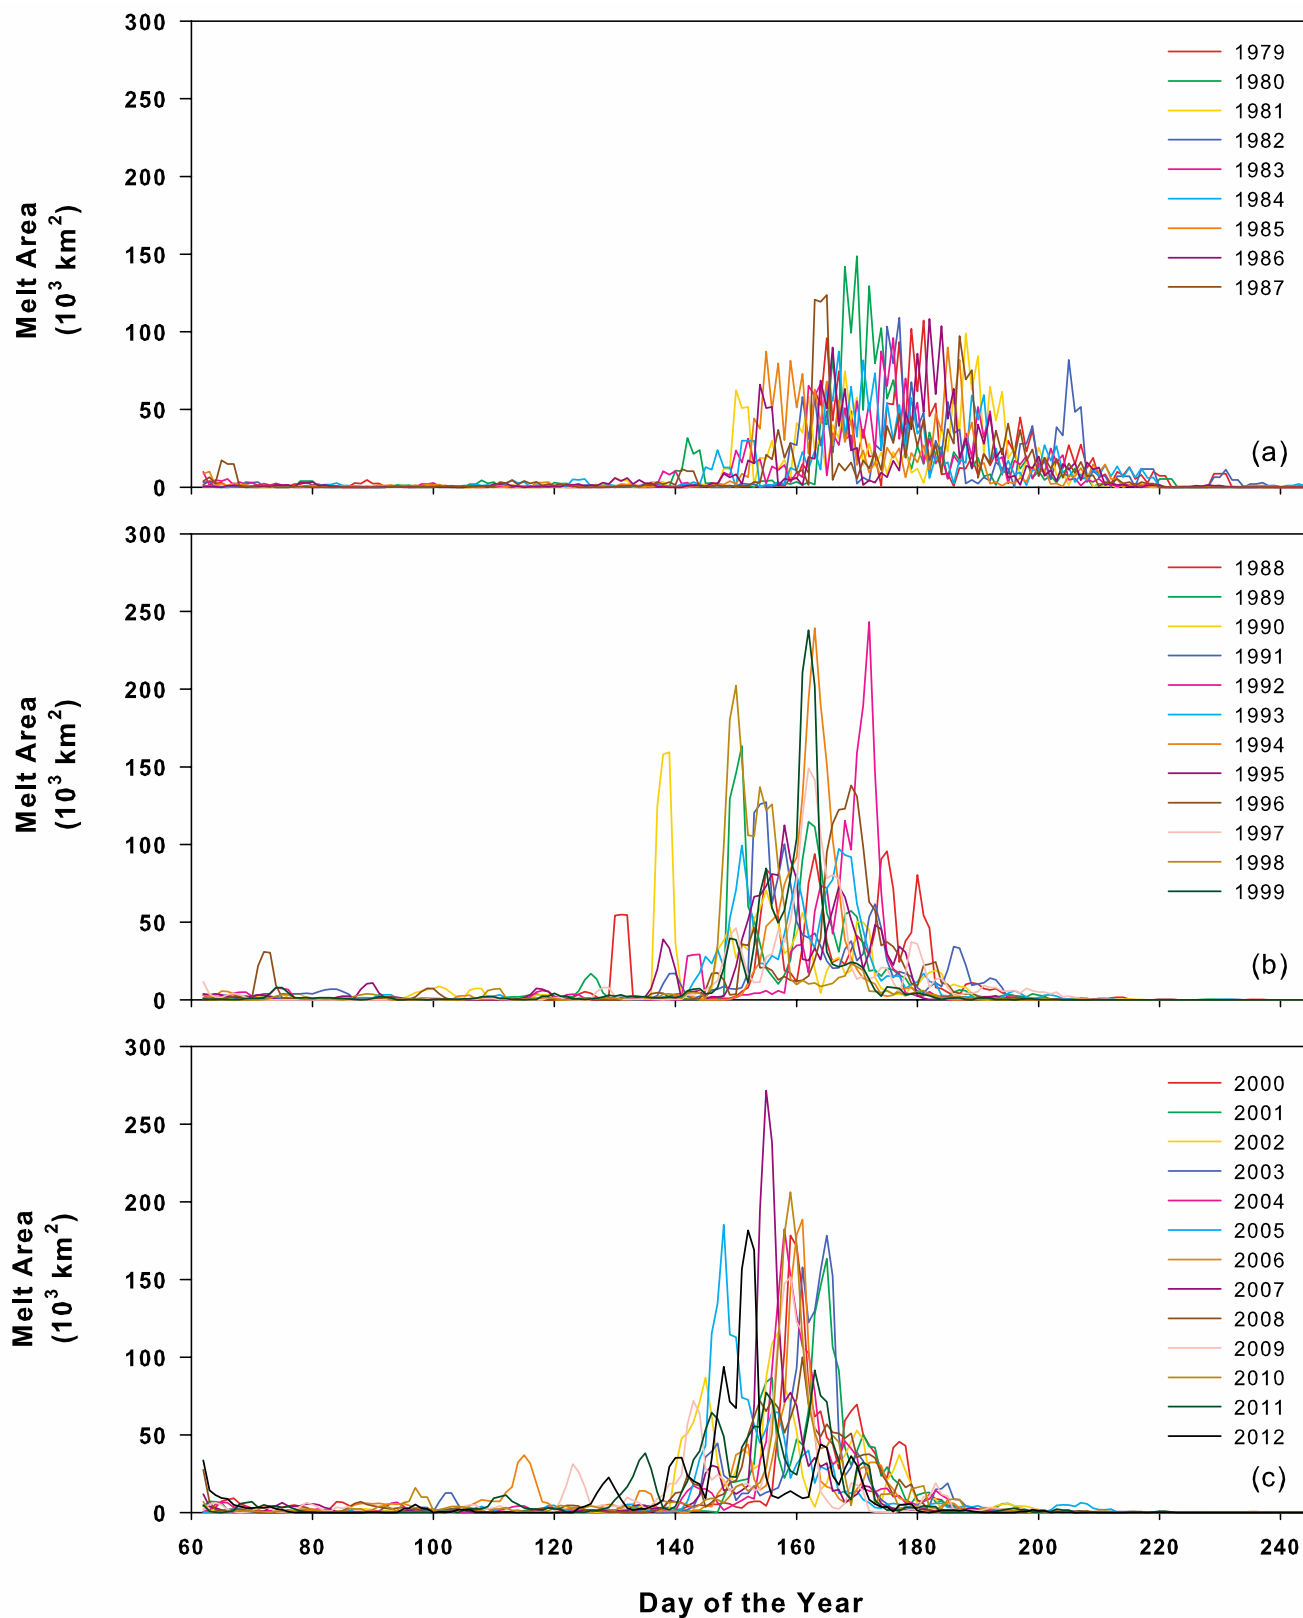

**Figure S9.** Baffin Bay 3-day running mean of daily MO area for (a) SMMR years, (b) early SSM/I years, and (c) late SSM/I and SSMIS years.

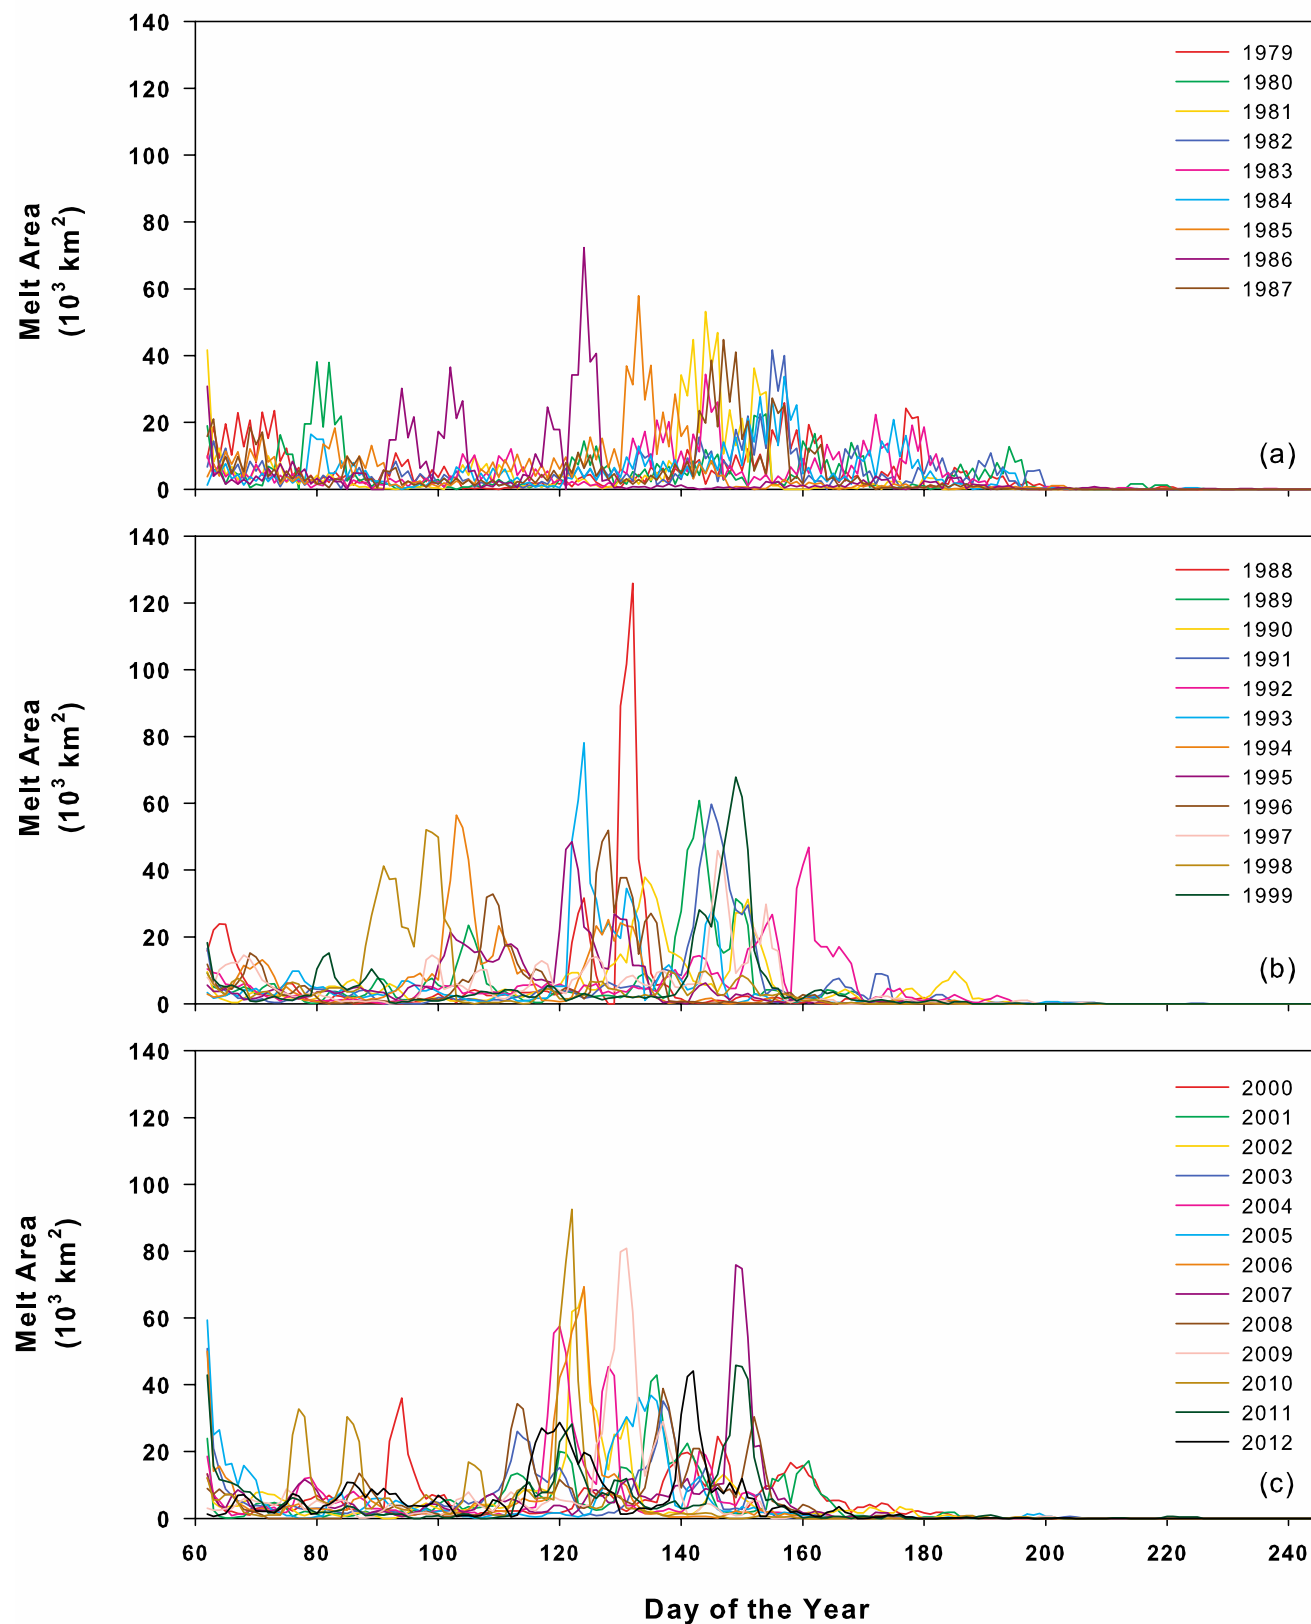

**Figure S10.** Greenland Sea 3-day running mean of daily MO area for (a) SMMR years, (b) early SSM/I years, and (c) late SSM/I and SSMIS years.

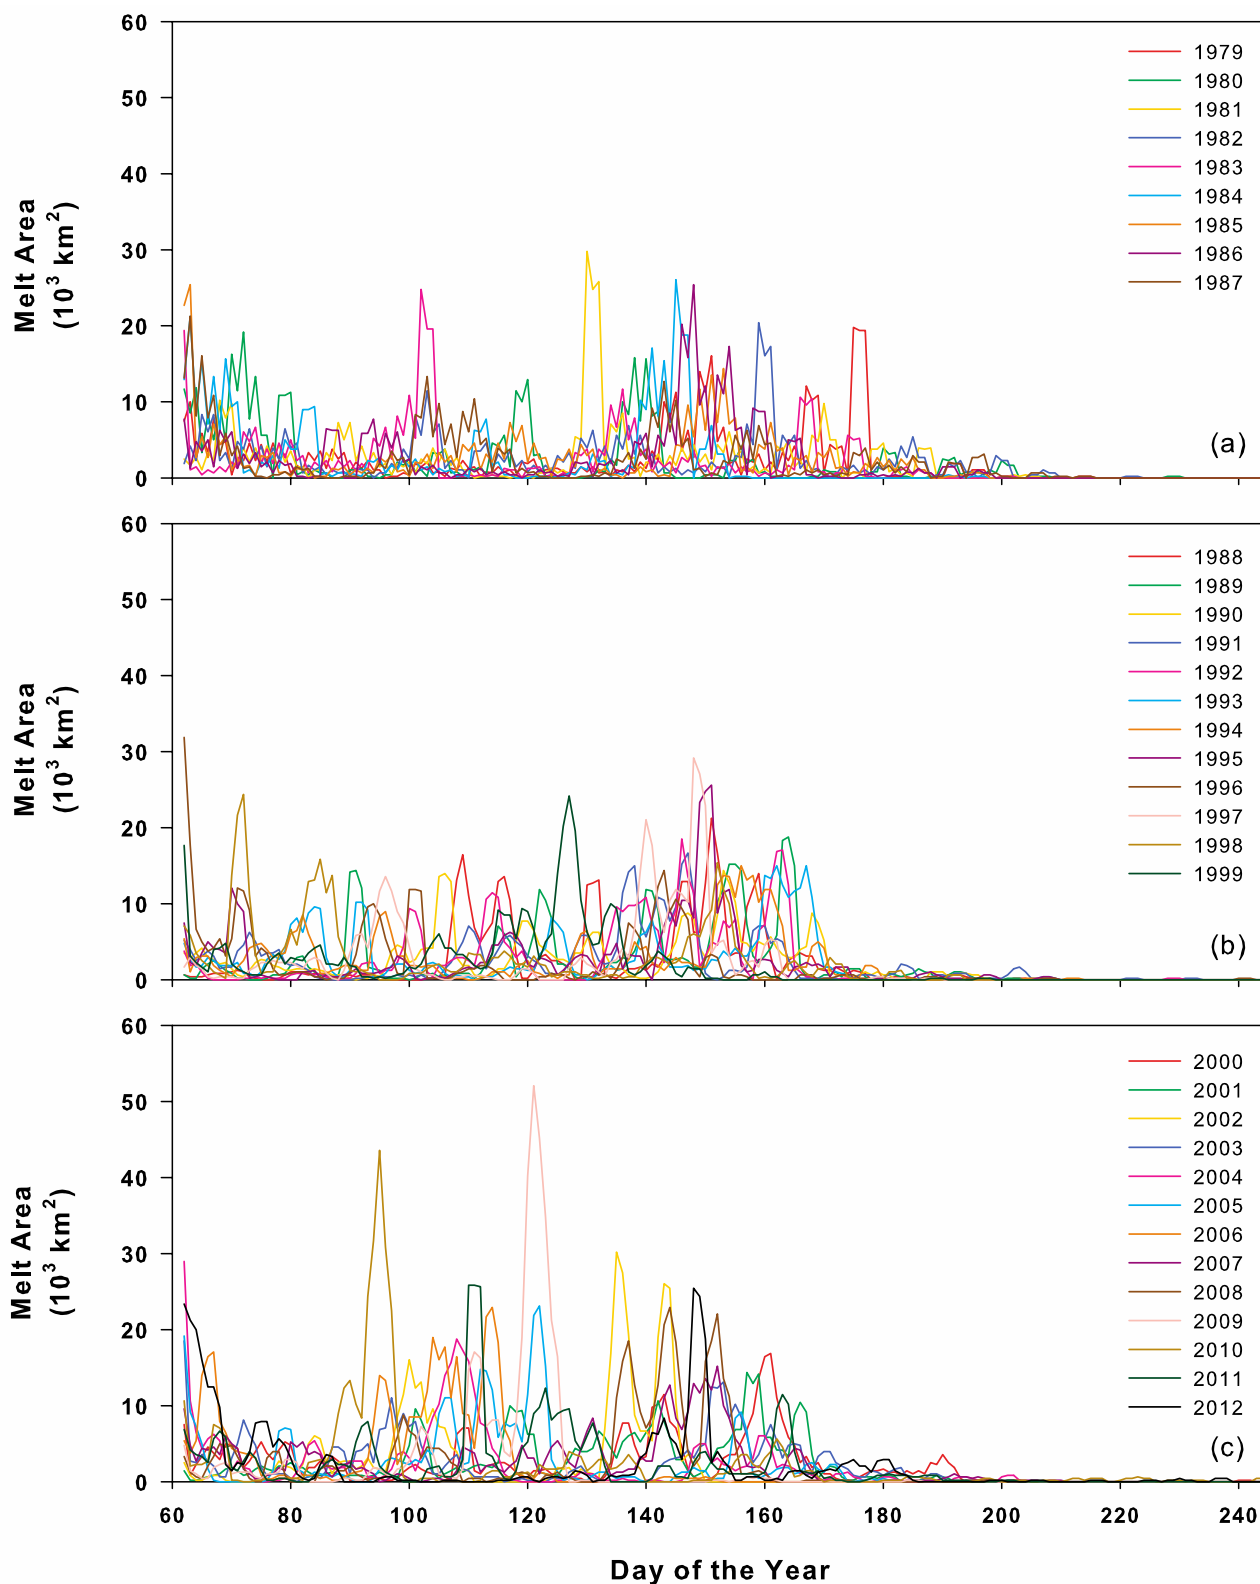

Supplement: s1 [file s1]
